# Supplementary material
Source: PubMed Central journal article supplement (PMC4839206)
Supplement: supp_db15-0662_DB150662SupplementaryData.pdf [file supp_db15-0662_DB150662SupplementaryData.pdf]

**A synergistic anti-obesity effect by a combination of capsinoids and cold temperature  
through the promotion of beige adipocyte biogenesis**

Kana Ohyama,<sup>1,2</sup> Yoshihito Nogusa,<sup>1</sup> Kosaku Shinoda,<sup>2</sup> Katsuya Suzuki,<sup>1</sup>  
Makoto Bannai,<sup>1\*</sup> and Shingo Kajimura<sup>2\*</sup>

<sup>1</sup>*Frontier Research Labs, Institute For Innovation, Ajinomoto Co., Inc., 1-1 Suzuki-cho  
Kawasaki-ku, Kanagawa 210-8681, Japan*

<sup>2</sup>*UCSF Diabetes Center and Department of Cell and Tissue Biology, University of California,  
San Francisco, 35 Medical Center Way, San Francisco, CA 94143-0669, USA*

SUPPLEMENTARY DATA

**Supplementary Figure S1.**

**Capsinoids treatment did not affect food intake and locomotor activity.**

(A) Total cumulative food intake during 8 weeks cohort of C57BL/6J mice (n=6). Mice were fed a high-fat diet supplemented with 0.3% capsinoids (CSNs+) or vehicle (CSNs-) for 8 weeks under ambient temperature (RT) or 17°C. Data are expressed as the mean ± SEM. N.S., not significant.

(B) Locomotive activity was measured in mice in (A) during the light phase and dark phase. Data are expressed as the mean ± SEM. N.S., not significant.

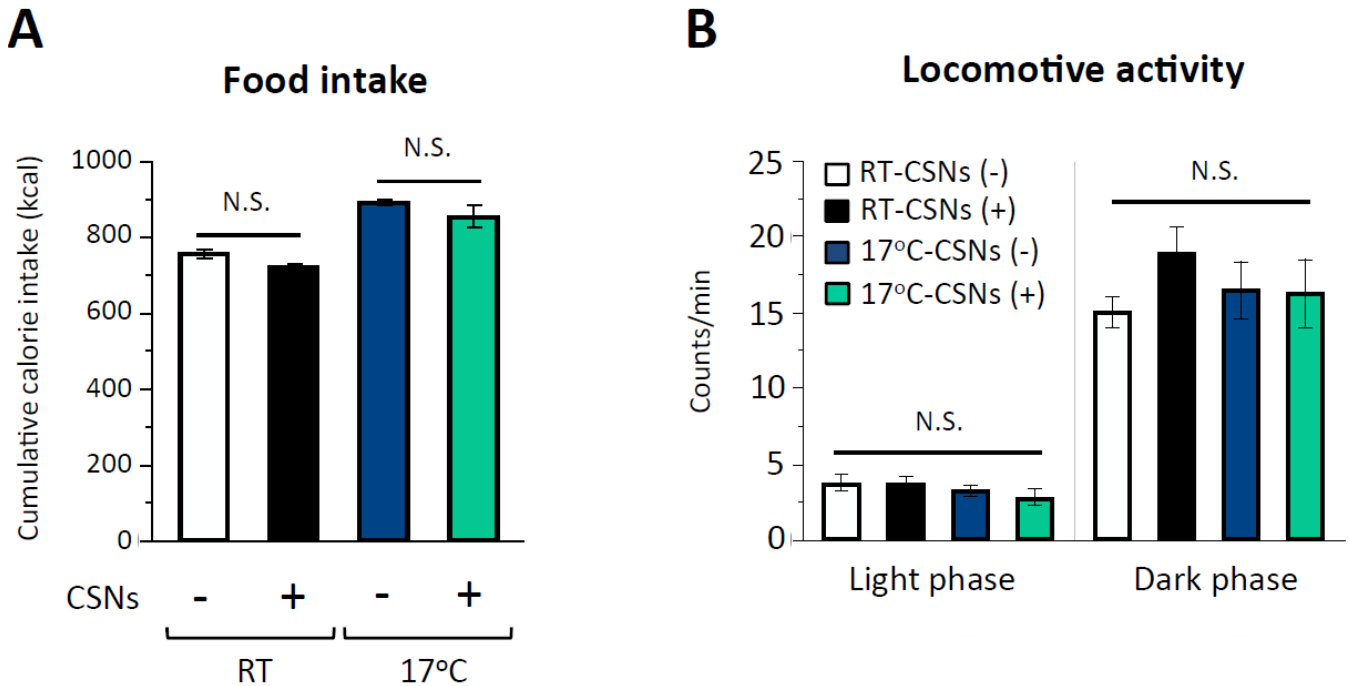

**Supplementary Figure S2.**

**Capsinoids treatment under 17°C increased whole-body energy expenditure in response to  $\beta$ 3-adrenergic activation.**

Whole body  $O_2$  consumption rate (ml/min/g) was measured in C57BL/6J male mice fed a high-fat diet supplemented with 0.3% capsinoids (CSNs+) or vehicle (CSNs-) under ambient temperature (RT) or 17°C (n=6). To stimulate BAT-thermogenesis, mice were injected with vehicle (saline) or the  $\beta$ 3-AR agonist (CL316243) at a dose of 0.01 mg/kg BW.  $O_2$  consumption rate was monitored for 3 hours after the injection. Bottom; quantification of changes in  $VO_2$  in response to CL316243. These changes were calculated by subtracting the  $VO_2$  of vehicle-treated mice from the  $VO_2$  of  $\beta$ 3-AR agonist-treated mice. \*p < 0.05, \*\*p < 0.01.

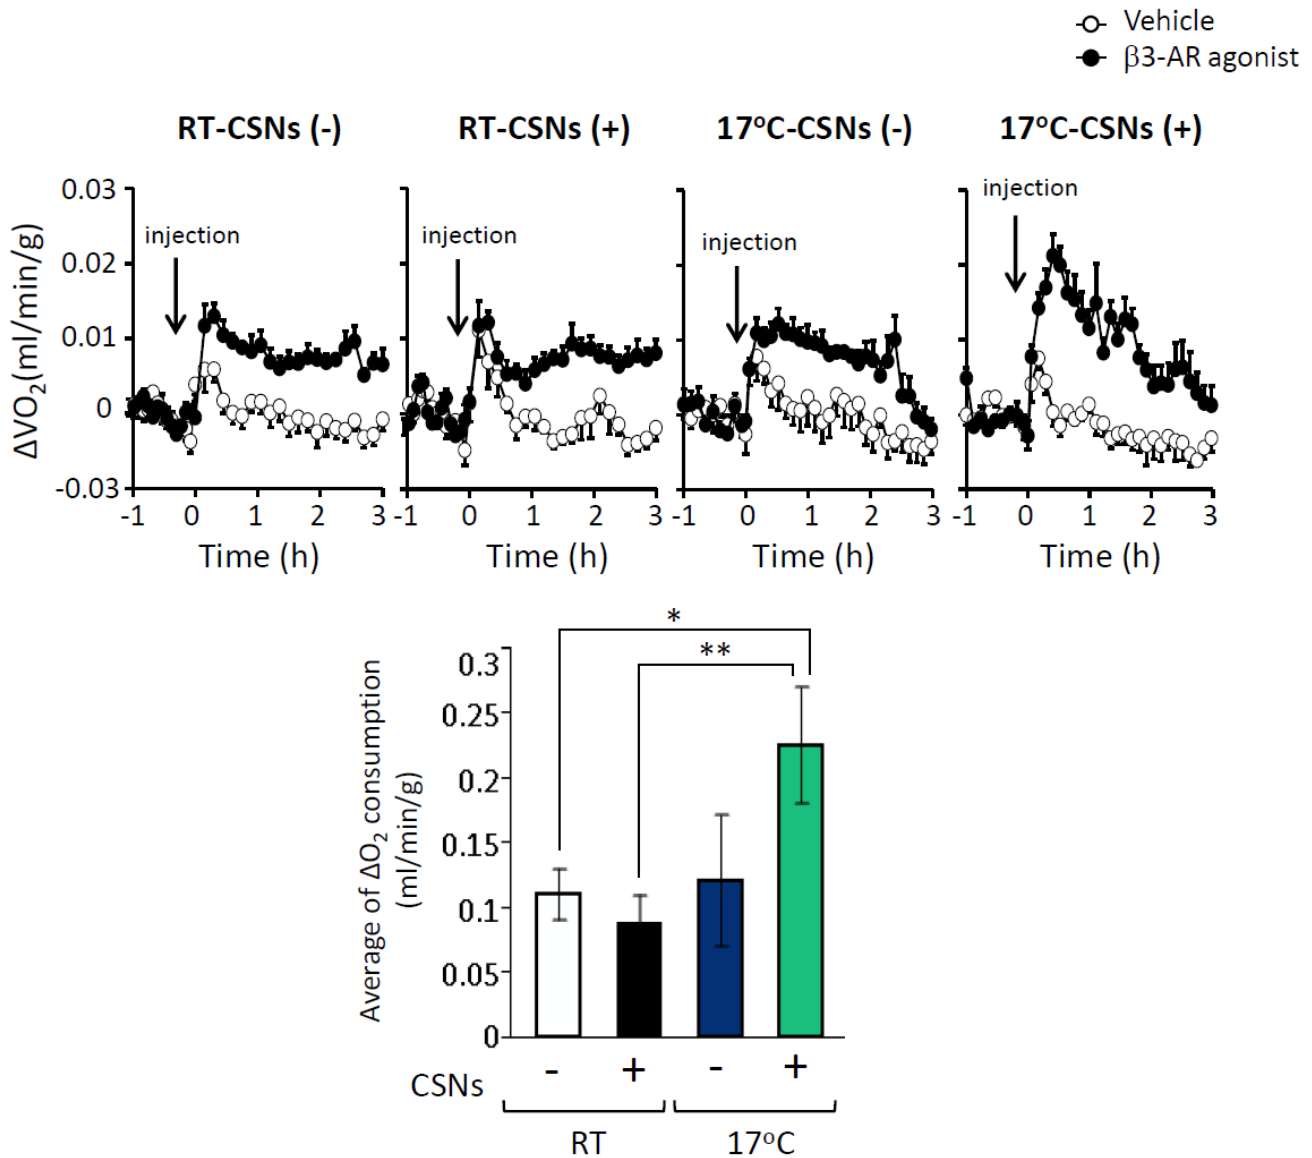

**Supplementary Figure S3.**

**Capsinoids treatment under 17°C improved systemic glucose homeostasis.**

(A) Glucose tolerance test (GTT) was performed in mice fed a high-fat diet supplemented with 0.3% capsinoids (CSNs+) or vehicle (CSNs-) for 6 weeks under 17°C (n=6). Blood glucose level was measured over the course of 120 min after injecting glucose at a dose of 2 g/kg BW. Data are expressed as the mean ± SEM. \*p < 0.05 relative to vehicle treated (CSNs-) group.

(B) Insulin tolerance test (ITT) was performed in mice fed a high-fat diet supplemented with 0.3% capsinoids (CSNs+) or vehicle (CSNs-) for 7 weeks under 17°C (n=6). Blood glucose level was measured over the course of 120 min after injecting insulin at a dose of 0.75 U/kg BW. Data are expressed as the mean ± SEM. \*p < 0.05, \*\*p < 0.01.

**A**

**Glucose Tolerance Test (at 17°C)**

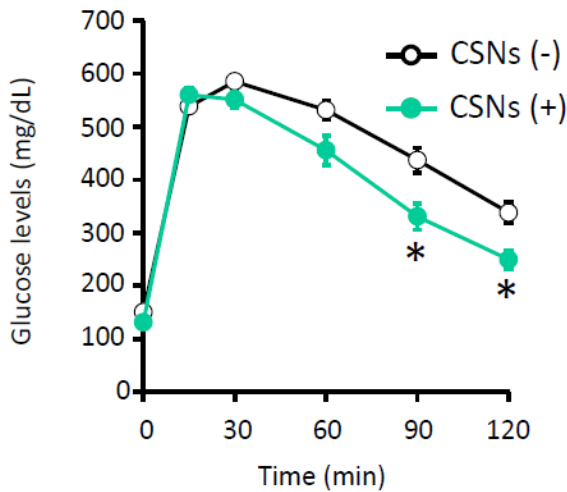

**B**

**Insulin Tolerance Test (at 17°C)**

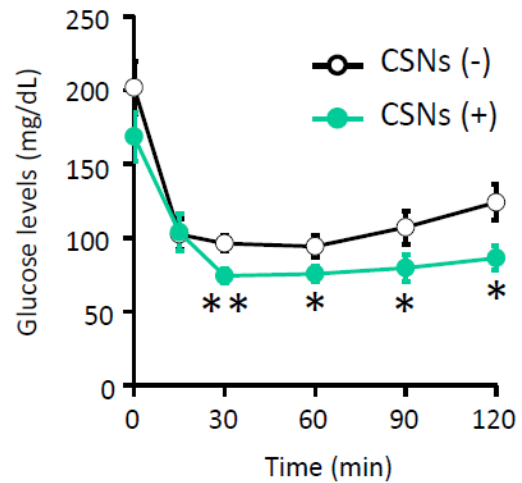

**Supplementary Figure S4.**

**Capsinoids and mild cold exposure synergistically increased the expression of beige adipocyte-selective genes in inguinal WAT.**

- (A) Relative mRNA expression levels of *Cd137*, *Tmem26*, *Cited1*, and *Tbx1* were measured by qRT-PCR in the inguinal WAT (left) and in the interscapular BAT (right) of mice kept under RT or 17°C (n=6). Mice were fed a high-fat diet supplemented with 0.3% capsinoids (CSNs+) or vehicle (CSNs-) for 8 weeks. Data are expressed as the mean ± SEM. \*p < 0.05. N.S., not significant.
- (B) Relative mRNA expression levels of *Dio2*, *Elovl3*, and *Fgf21* were measured by qRT11 PCR in the interscapular BAT of mice in (A). Data are expressed as the mean ± SEM. \*p < 0.05. N.S., not significant.

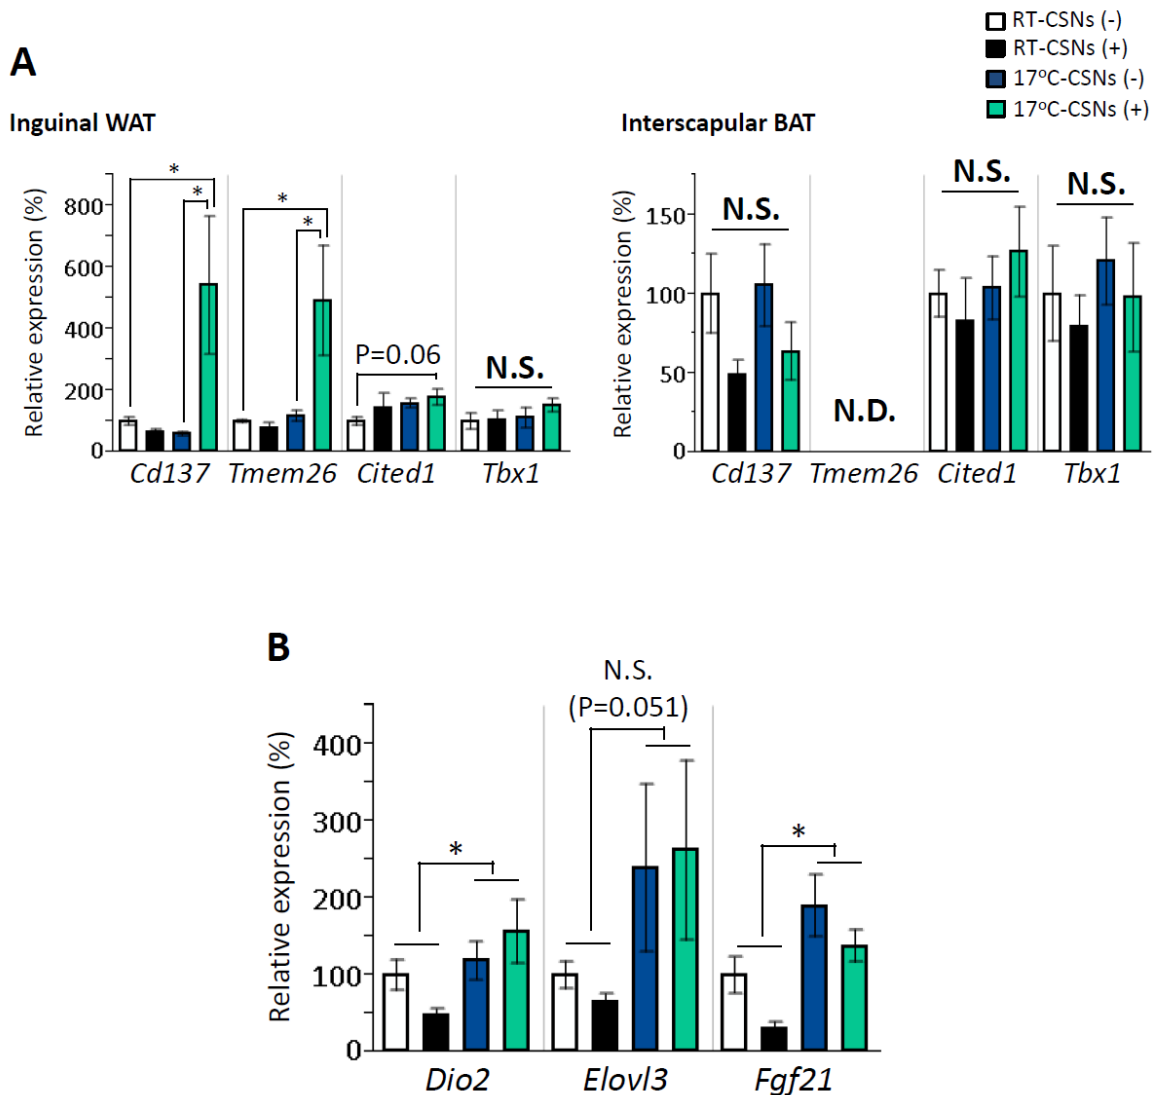

SUPPLEMENTARY DATA

**Supplementary Figure S5.**

**Expression levels of thermogenic genes in inguinal WAT and interscapular BAT.**

Relative mRNA expression levels of *Adipoq* were measured by qRT-PCR in the inguinal WAT and in the interscapular BAT of mice kept under RT or 17°C (n=6). Mice were fed a high-fat diet supplemented with 0.3% capsinoids (CSNs+) or vehicle (CSNs-) for 8 weeks. Data are expressed as the mean ± SEM. N.S., not significant.

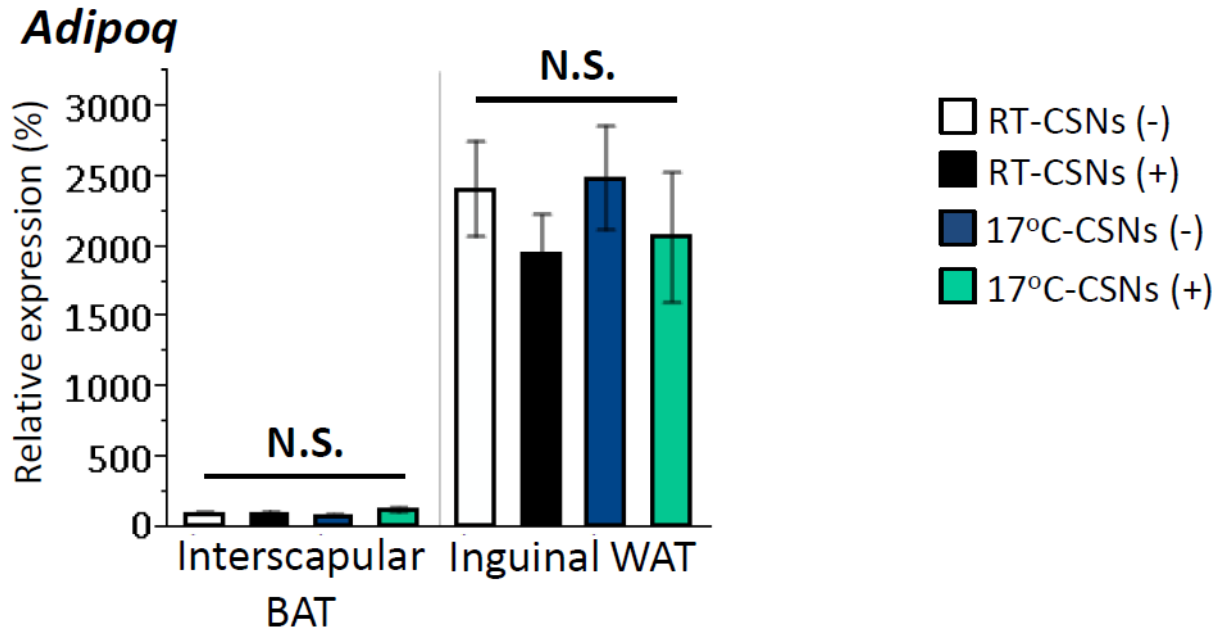

SUPPLEMENTARY DATA

**Supplementary Figure S6.**

**UCP1 protein expression in inguinal WAT and interscapular BAT.**

UCP1 protein levels were analyzed by Western blotting in the inguinal WAT and the interscapular BAT from mice kept under RT or 17°C (n=6).  $\beta$ -actin was used as a loading control. Right; quantification of density of UCP-1/ $\beta$ -actin.

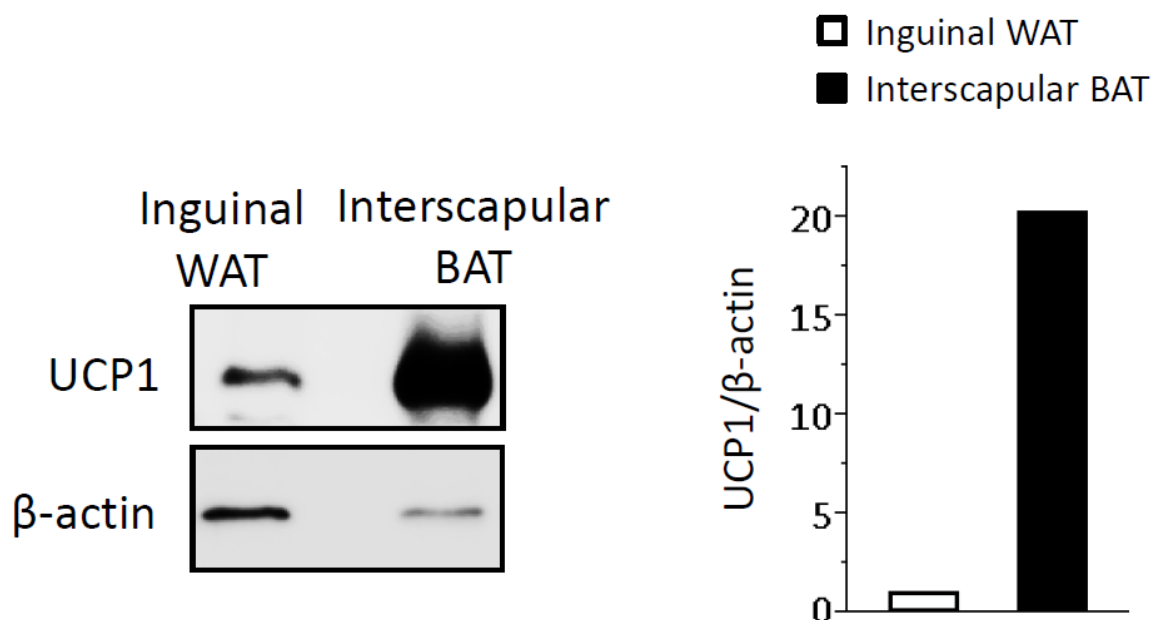

SUPPLEMENTARY DATA

**Supplementary Figure S7.**

**Capsinoids-induced circulation factors do not contribute to the development of beige adipocytes.**

Relative mRNA expression levels of *Ucp1*, *Cidea*, *Cox8b*, and *Pgc1 $\alpha$*  were measured by qRT31 PCR in the differentiated primary inguinal adipocytes from C57BL/6J mice (n=3). The adipocytes were treated with 2% plasma from mice fed HFD with or without 0.3% CSNs at 17°C for 8 weeks. Data are expressed as the means  $\pm$  SEM.

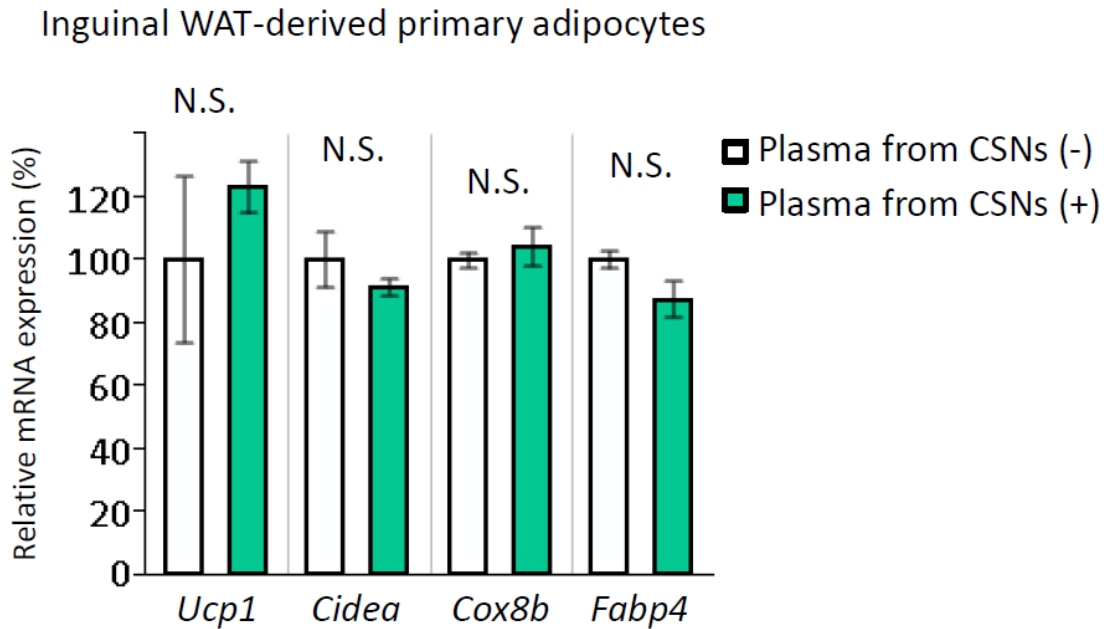



**Supplementary Figure S8.**

**β2-AR agonists recruited beige adipocyte biogenesis.**

(A) Relative mRNA expression levels of *Ucp1*, *Cidea*, *Cox8b*, and *aP2* were measured by qRT-PCR in the inguinal WAT of mice injected with vehicle (saline) or the β2-AR agonists (procaterol or salmeterol) at a dose of 1 mg/kg/day under ambient temperature for 1 week (n=6). \*p < 0.05, \*\*p < 0.001. N.S., not significant.

(B) UCP1 protein expression was analyzed by Western blotting in the inguinal WAT of mice shown in (A). β-actin was used as a loading control.

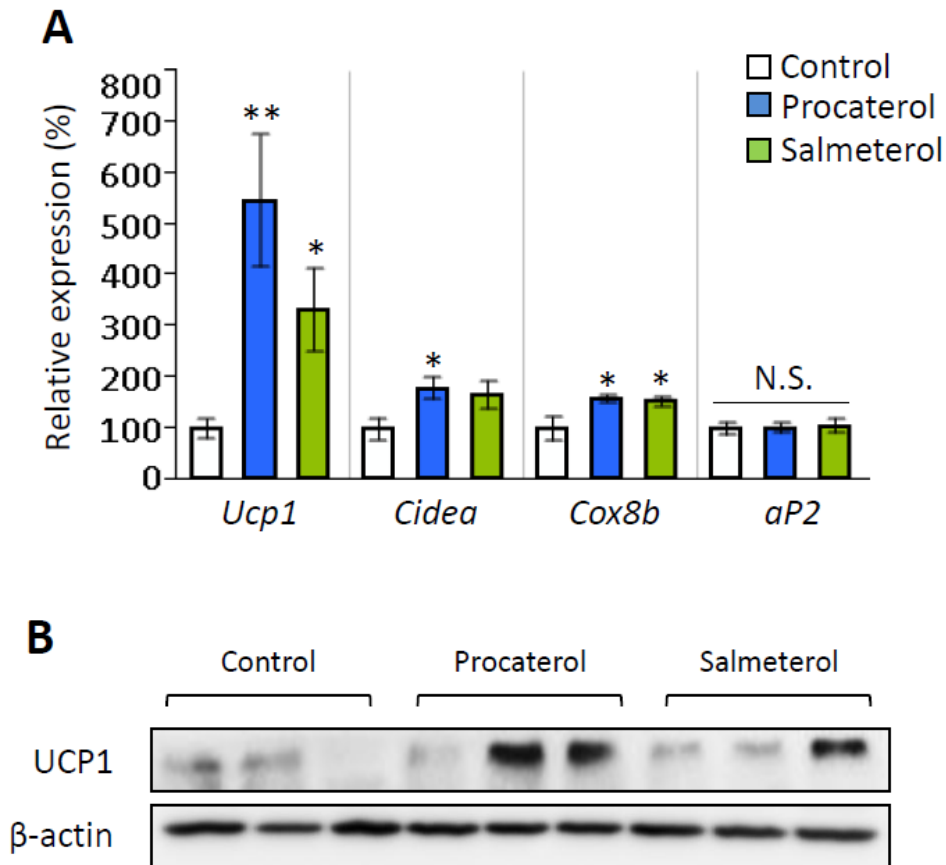

SUPPLEMENTARY DATA

**Supplementary Figure S9.**

**$\beta$ 2-AR antagonist blocked the capsinoids-induced PRDM16 protein accumulation without affecting its mRNA expression.**

Mice were fed a high-fat diet supplemented with 0.3% capsinoids (CSNs+) or vehicle (CSNs-) for 4 weeks under 17°C (n=6). The mice were daily injected with vehicle (saline) or the  $\beta$ 2-AR antagonist (ICI 118,551) at a dose of 2 mg/kg/day. Endogenous PRDM16 protein expression in the inguinal WAT of these mice was analyzed by Western blotting (left).  $\beta$ -actin was used as a loading control. Relative *Prdm16* mRNA expression was measured by qRT-PCR (right). Data are expressed as the mean  $\pm$  SEM. N.S., not significant.

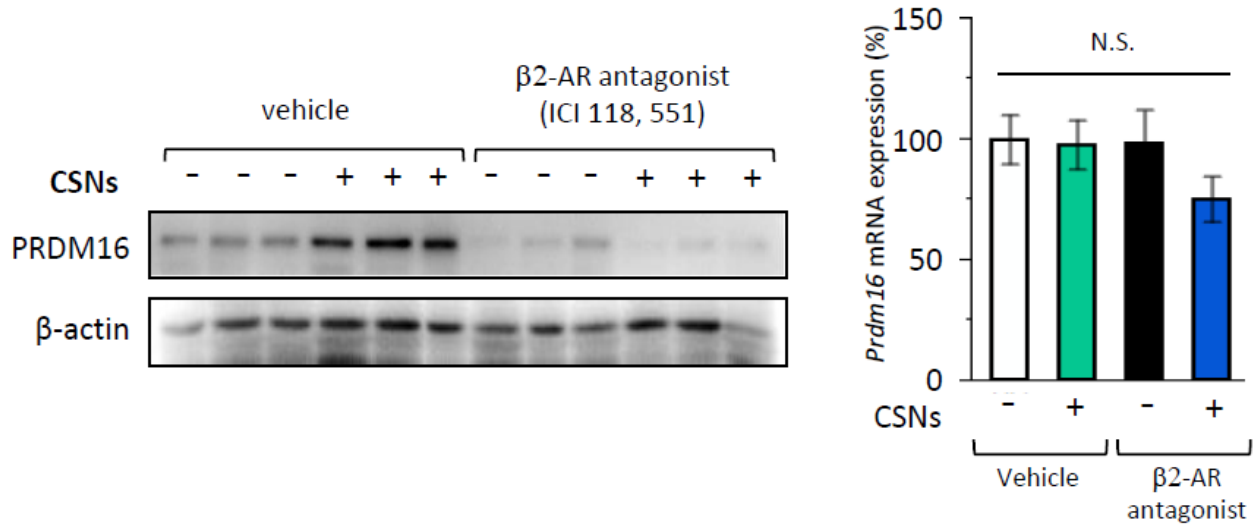

**Supplementary Figure S10.**

**A  $\beta$ 3-AR agonist did not induce PRDM16 accumulation in cultured inguinal WAT-derived primary adipocytes.**

Inguinal WAT-derived primary preadipocytes were differentiated in the presence or absence of the  $\beta$ 2-AR agonist (formoterol) or the  $\beta$ 3-AR agonist (CL316243) at doses of 0.01 and 1  $\mu$ M. The relative mRNA expression levels of *Ucp1*, *Dio2*, *Cox8b*, and *aP2* were measured by qRT-PCR. Data are expressed as the mean  $\pm$  SEM. \*\* $p < 0.01$ , \*\*\* $p < 0.001$  relative to the vehicle-treated (control) group.

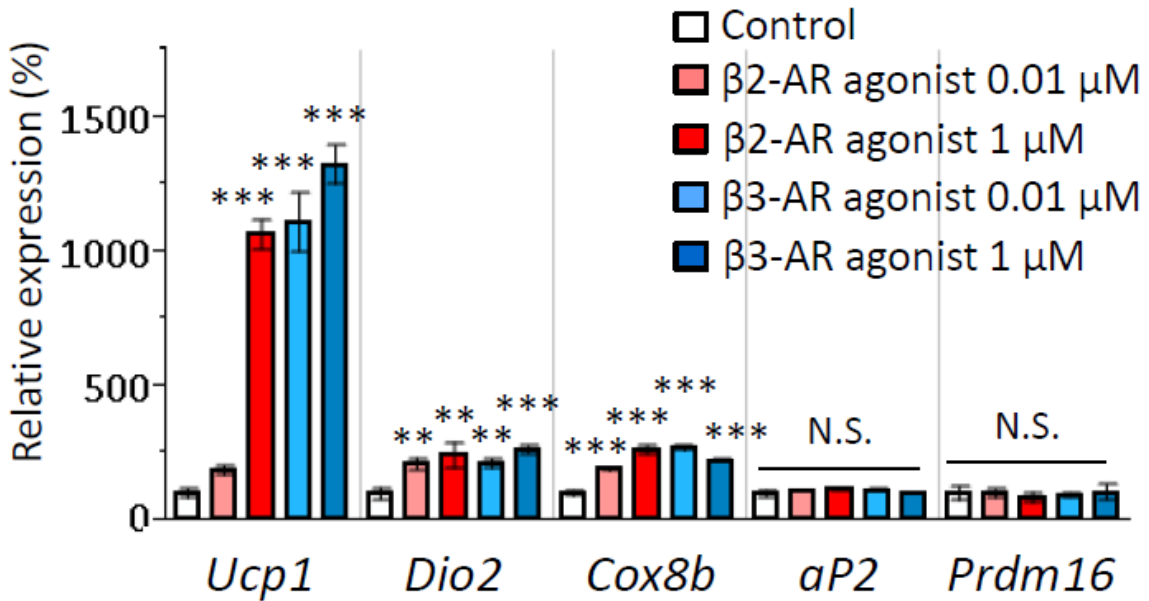

SUPPLEMENTARY DATA

**Supplementary Figure S11.**

**Capsinoids increased the expression of fatty acid oxidative genes in the liver**

Relative mRNA expression levels of *Hsl*, *Atgl*, *Aco*, *Cpt2*, and *Pgc1α* were measured by qRT PCR in the inguinal WAT (left) and in the interscapular BAT (right) of mice kept under RT or 17°C (n=6). Mice were fed a high-fat diet supplemented with 0.3% capsinoids (CSNs+) or vehicle (CSNs-) for 8 weeks. Data are expressed as the mean ± SEM. \*p < 0.05, \*\*p < 0.01.

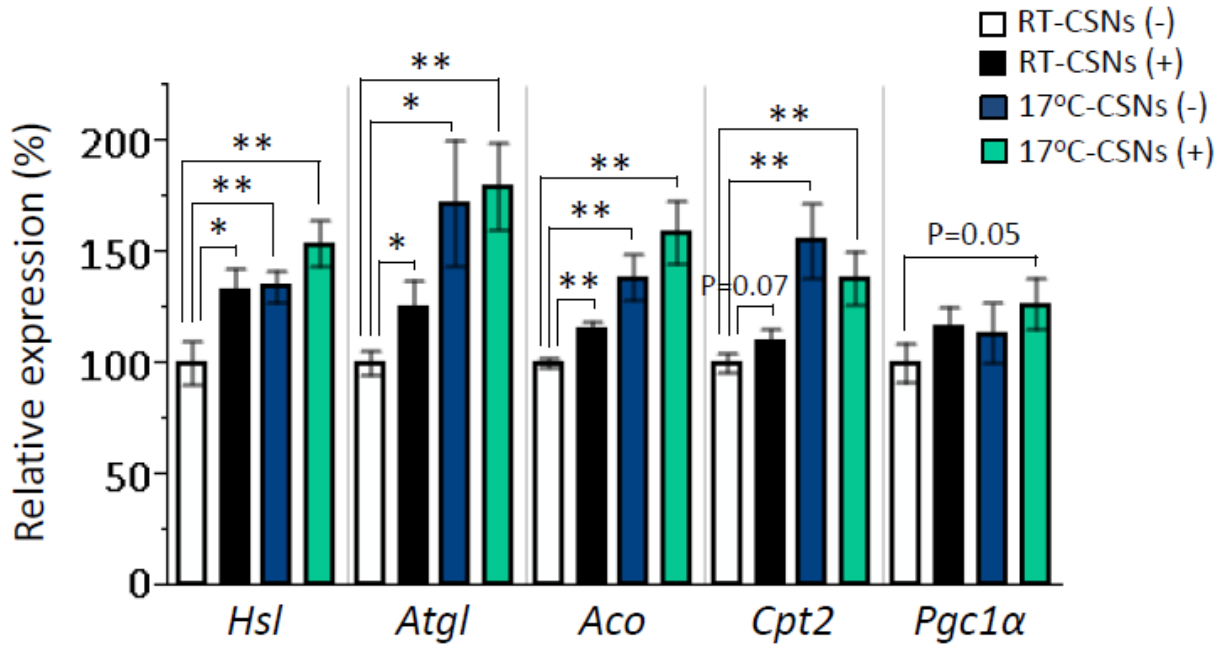

## SUPPLEMENTARY DATA

**Supplementary Table 1.** Compositions of the experimental diets (%)

|                       | HFD   | HFD +<br>CSNs (0.3%) |
|-----------------------|-------|----------------------|
| Casein                | 20    | 20                   |
| Sucrose               | 10    | 10                   |
| Corn starch           | 22.48 | 22.48                |
| $\alpha$ -corn starch | 7.47  | 7.47                 |
| L-cysteine            | 0.3   | 0.3                  |
| Cellulose             | 5     | 5                    |
| Lard                  | 30    | 30                   |
| Mineral mix           | 3.5   | 3.5                  |
| Vitamin mix           | 1     | 1                    |
| Choline bitartrate    | 0.25  | 0.25                 |
| Capsinoids            | -     | 0.3                  |

SUPPLEMENTARY DATA

**Supplementary Table 2.** Primers used for real-time PCR analysis

| Gene          | Sense                  | Antisense                 | Entrez Gene ID |
|---------------|------------------------|---------------------------|----------------|
| <i>Aco</i>    | CATTGGCATCGTGAGAACAG   | AGCAAATCTGATGGCTTTGA      | 11430          |
| <i>Adipoq</i> | CTGACGACACCAAAGGGCTCAG | GCCTGCCATCCAACCTGCACAA    | 11450          |
| <i>Atgl</i>   | GGAGACCAAGTGGAACATCTCA | AATAATGTTGGCACCTGCTTCA    | 66853          |
| <i>β1AR</i>   | CCGAAAGCAGGTGAATGCAA   | AGCCAGTAAGCCATACTAAGCCACA | 11554          |
| <i>β2AR</i>   | CATTGATGTGTTGTGCGTCA   | ACTCGGGCCTTATTCTTGGT      | 11555          |
| <i>β3AR</i>   | CCTTCCGTCGTCTTCTGTGT   | AGCCATCAAACCTGTTGAGC      | 11556          |
| <i>Cd137</i>  | CGTGCAGAACTCTGTGATAAC  | GTCCACCTATGCTGGAGAA       | 21942          |
| <i>Cidea</i>  | ATCACAACTGGCCTGGTTACG  | TACTACCCGGTGTCCATTTCT     | 12683          |
| <i>Cited1</i> | AACCTTGGAGTGAAGGATCGC  | GTAGGAGAGCCTATTGGAGATGT   | 12705          |
| <i>Cox8B</i>  | GAACCATGAAGCCAACGACT   | GCGAAGTTCACAGTGTTCC       | 12869          |
| <i>Cpt2</i>   | CAGCACAGCATCGTACCCA    | TCCAATGCCGTTCTCAAAAT      | 12896          |
| <i>Dio2</i>   | AATTATGCCTCGGAGAAGACCG | GGCAGTTGCCTAGTGAAAGGT     | 13371          |
| <i>Elovl3</i> | TTCTCACGCGGGTAAAAATGG  | GAGCAACAGATAGACGACCAC     | 12686          |
| <i>Fabp4</i>  | ACACCGAGATTTCTTAAACTG  | CCATCTAGGGTTATGATGCTCTTCA | 11770          |
| <i>Fgf21</i>  | CTGCTGGGGTCTACCAAG     | CTGCGCCTACCACTGTTCC       | 56636          |
| <i>Gapdh</i>  | CTGAGGACCAGGTTGCTCC    | ACCACCCTGTGCTGTAGCC       | 14433          |
| <i>Hsl</i>    | TGTGGCACAGACCTCTAAAT   | GGCATATCCGCTCTC           | 16890          |
| <i>Pgc1α</i>  | CACTACAGACACCGCACACA   | AGGCTTCATAGCTGTCGTACC     | 19017          |
| <i>Prdm16</i> | CAGCACGGTGAAGCCATTC    | GCGTGCATCCGCTTGTG         | 70673          |
| <i>Tbp</i>    | ACCCTTACCAATGACTCCTATG | TGACTGCAGCAAATCGCTTGG     | 21374          |
| <i>Tbx1</i>   | CTGTGGGACGAGTTCAATCAG  | TTGTCATCTACGGGCACAAAG     | 21380          |
| <i>Tmem26</i> | TTCCTGTTGCATTCCCTGGTC  | GCCGGAGAAAGCCATTTGT       | 327766         |
| <i>Ucp1</i>   | CACCTTCCCCCTGGACT      | CCCTAGGACACCTTTATACCT     | 22227          |
